# Supplementary material for: The role of sulfur interactions in crystal architecture: experimental and quantum theoretical studies on hydrogen, halogen, and chalcogen bonds in trithiocyanuric acid–pyridine N-oxide co-crystals
Source: Royal Society of Chemistry journal article supplement (doi:10.1039/d0ce01319f), 2020-11-06
Supplement: d0ce01319f1.pdf [file d0ce01319f1.pdf]

THE ROLE OF SULFUR INTERACTIONS IN CRYSTAL ARCHITECTURE: EXPERIMENTAL AND  
QUANTUM THEORETICAL STUDIES ON HYDROGEN, HALOGEN, AND CHALCOGEN BONDS IN  
TRITHIOCYANURIC ACID -  
PYRIDINE *N*-OXIDE CO-CRYSTALS

Kinga Wzgarda-Raj<sup>1</sup>, Marcin Palusiak<sup>1</sup>, Sławomir Wojtulewski<sup>2</sup>,  
Agnieszka J. Rybarczyk-Pirek<sup>1\*</sup>

<sup>1</sup> Department of Physical Chemistry, Faculty of Chemistry, University of Łódź, ul. Pomorska  
163/165, 90-236 Lodz, Poland

<sup>2</sup> Institute of Chemistry, University of Białystok, ul. Ciołkowskiego 1K, 15-245 Białystok, Poland.

Supporting Information

I. Crystallographic data of the I-IV crystal structures.

|                          | I                                                                                             | II                                                                                                                           | III                                                                                                                          | IV                                                                                                                                           |
|--------------------------|-----------------------------------------------------------------------------------------------|------------------------------------------------------------------------------------------------------------------------------|------------------------------------------------------------------------------------------------------------------------------|----------------------------------------------------------------------------------------------------------------------------------------------|
| <b>Crystal Data</b>      |                                                                                               |                                                                                                                              |                                                                                                                              |                                                                                                                                              |
| Formula                  | C <sub>3</sub> H <sub>3</sub> N <sub>3</sub> S <sub>3</sub> ·C <sub>5</sub> H <sub>5</sub> NO | C <sub>3</sub> H <sub>3</sub> N <sub>3</sub> S <sub>3</sub> ·2(C <sub>5</sub> H <sub>4</sub> N <sub>2</sub> O <sub>3</sub> ) | 4(C <sub>3</sub> H <sub>3</sub> N <sub>3</sub> S <sub>3</sub> )· 2(C <sub>5</sub> H <sub>4</sub> BrNO)·<br>2H <sub>2</sub> O | C <sub>3</sub> H <sub>3</sub> N <sub>3</sub> S <sub>3</sub> ·<br>C <sub>10</sub> H <sub>9</sub> N <sub>2</sub> O <sub>2</sub> S <sub>2</sub> |
| M [g·mol <sup>-1</sup> ] | 272.4                                                                                         | 457.7                                                                                                                        | 1093.1                                                                                                                       | 429.6                                                                                                                                        |
| Crystal system           | monoclinic                                                                                    | monoclinic                                                                                                                   | triclinic                                                                                                                    | triclinic                                                                                                                                    |
| Space group              | <i>C</i> 2/ <i>c</i>                                                                          | <i>P</i> 2 <sub>1</sub> / <i>c</i>                                                                                           | <i>p</i> $\bar{1}$                                                                                                           | <i>p</i> $\bar{1}$                                                                                                                           |
| Unit cell:               |                                                                                               |                                                                                                                              |                                                                                                                              |                                                                                                                                              |
| a [Å]                    | 22.0734(4)                                                                                    | 17.0067(3)                                                                                                                   | 6.9760(2)                                                                                                                    | 9.3250(3)                                                                                                                                    |
| b [Å]                    | 4.4546(1)                                                                                     | 4.5591(1)                                                                                                                    | 11.2345(2)                                                                                                                   | 9.4506(4)                                                                                                                                    |
| c [Å]                    | 22.9310(4)                                                                                    | 24.5193(3)                                                                                                                   | 26.3305(5)                                                                                                                   | 11.0920(4)                                                                                                                                   |
| α [°]                    | 90                                                                                            | 90                                                                                                                           | 80.082(2)                                                                                                                    | 108.119(3)                                                                                                                                   |
| β [°]                    | 95.154(2)                                                                                     | 108.580(2)                                                                                                                   | 85.993(2)                                                                                                                    | 91.734(3)                                                                                                                                    |
| γ [°]                    | 90                                                                                            | 90                                                                                                                           | 80.258(2)                                                                                                                    | 112.132(4)                                                                                                                                   |
| V [Å <sup>3</sup> ]      | 2245.7(8)                                                                                     | 1802.0(6)                                                                                                                    | 2001.7(8)                                                                                                                    | 848.4(6)                                                                                                                                     |
| Z                        | 8                                                                                             | 4                                                                                                                            | 2                                                                                                                            | 2                                                                                                                                            |

|                                                          |                       |                       |                       |                       |
|----------------------------------------------------------|-----------------------|-----------------------|-----------------------|-----------------------|
| $F(000)$                                                 | 1120.0                | 936.0                 | 1103.6                | 440.0                 |
| $d_x$ [mg m <sup>-3</sup> ]                              | 1.611                 | 1.686                 | 1.814                 | 1.681                 |
| $\mu$ [mm <sup>-1</sup> ]                                | 5.925                 | 4.244                 | 8.880                 | 6.482                 |
| Crystal size [mm]                                        | 0.076 x 0.137 x 0.190 | 0.027 x 0.104 x 0.208 | 0.150 x 0.090 x 0.014 | 0.074 x 0.108 x 0.152 |
| Crystal description                                      | colourless            | colourless            | colourless            | colourless            |
| <b>Data collection</b>                                   |                       |                       |                       |                       |
| $\lambda$ [Å]                                            | CuK $\alpha$          | CuK $\alpha$          | CuK $\alpha$          | CuK $\alpha$          |
| $2\theta$ range [°]                                      | 7.742 – 152.954       | 5.482 – 153.064       | 6.822 – 153.494       | 8.508 – 153.086       |
| T [K]                                                    | 100                   | 100                   | 100                   | 100                   |
| $R_{int}$                                                | 0.0379                | 0.0266                | 0.0322                | 0.0253                |
| <b>Refinement</b>                                        |                       |                       |                       |                       |
| Data unique/<br>Parameters                               | 2368/146              | 3790/263              | 7385/560              | 3541/227              |
| $R/wR^2$ [ $I > 2\sigma(I)$ ]                            | 0.0250/0.0678         | 0.0271/0.0691         | 0.0267/0.0647         | 0.0246/0.0614         |
| $R/wR^2$ (all data)                                      | 0.0253/0.0680         | 0.0299/0.0714         | 0.0286/0.0553         | 0.0266/0.0630         |
| $\Delta\rho_{min}/\Delta\rho_{max}$ [e·Å <sup>-3</sup> ] | 0.28/-0.30            | 0.29/-0.25            | 0.54/-0.81            | 0.28/-0.28            |
| Goof on $F^2$                                            | 1.051                 | 1.033                 | 1.043                 | 1.069                 |

II. Parameters of selected hydrogen bonds for crystal structures I–IV [Å, °].

|                    | Donor molecule   | Acceptor molecule | Hydrogen bonds    | D - H              | H...A     | D...A      | D- H...A   | symmetry             |                 |
|--------------------|------------------|-------------------|-------------------|--------------------|-----------|------------|------------|----------------------|-----------------|
| I                  | TTCA             | TTCA              | N5-H5...S4        | 0.87(2)            | 2.45(2)   | 3.3140(12) | 171.2(18)  | $3/2-x, 3/2-y, 1-z$  |                 |
|                    |                  |                   | N1-H1...S6        | 0.83(2)            | 2.50(2)   | 3.3104(12) | 165(2)     | $1-x, 2-y, 1-z$      |                 |
|                    |                  | PNO               | N3-H3...O11       | 0.91(2)            | 1.71(2)   | 2.6189(15) | 174(2)     | $x, y, z$            |                 |
|                    |                  |                   | N3-H3...N11       | 0.91(2)            | 2.46(2)   | 3.2874(17) | 152.5(18)  | $x, y, z$            |                 |
| II                 | TTCA             | NPNO              | N1-H1...O11A      | 0.804(19)          | 1.95(2)   | 2.7386(16) | 166.9(19)  | $x, y, z$            |                 |
|                    |                  |                   | N3-H3...O11B      | 0.84(2)            | 1.87(2)   | 2.7113(16) | 171.7(18)  | $-x, y, z$           |                 |
|                    |                  | TTCA              | N5-H5...S6        | 0.878(19)          | 2.461(19) | 3.3221(13) | 166.9(19)  | $-x, 1-y, -z$        |                 |
|                    | NPNO             | NPNO              | C12A-H12A...O11A  | 0.94(2)            | 2.17(2)   | 3.1010(19) | 170.7(17)  | $-x, 1/2+y, 1/2-z$   |                 |
|                    |                  |                   | C15A-H15A...O142B | 0.94(2)            | 2.385(19) | 3.3150(18) | 171.6(16)  | $1-x, -1/2+y, 1/2-z$ |                 |
|                    |                  |                   | C12B-H12B...O11B  | 0.955(19)          | 2.491(19) | 3.1915(15) | 130.2(14)  | $1-x, -1/2+y, 1/2-z$ |                 |
|                    |                  |                   | C16B-H16B...O141A | 0.94(2)            | 2.476(19) | 3.1389(17) | 127.9(15)  | $x, 1/2-y, -1/2+z$   |                 |
| III                | TTCA             | TTCA              | N3C-H3C...S2B     | 0.85(3)            | 2.50(3)   | 3.3370(16) | 170(2)     | $1-x, 1-y, -z$       |                 |
|                    |                  |                   | BPNO              | N1C-H1C...O11A     | 0.93(3)   | 1.75(3)    | 2.673(2)   | 174(3)               | $x, y, z$       |
|                    |                  | TTCA              | TTCA              | N5C-H5C...S4B      | 0.85(3)   | 2.50(3)    | 3.3370(16) | 170(2)               | $1-x, 2-y, -z$  |
|                    |                  |                   |                   | N5B-H5B...S4C      | 0.81(3)   | 2.54(3)    | 3.3445(16) | 174(3)               | $1-x, 2-y, -z$  |
|                    |                  |                   |                   | N3B-H3B...S2C      | 0.80(3)   | 2.44(3)    | 3.2321(16) | 172(3)               | $1-x, 1-y, -z$  |
|                    |                  |                   |                   | N1D-H1D...S6A      | 0.82(3)   | 2.41(3)    | 3.2170(16) | 170(3)               | $1-x, 1-y, 1-z$ |
|                    |                  |                   |                   | N3A-H3A...S2D      | 0.87(3)   | 2.40(3)    | 3.2553(17) | 169(3)               | $1-x, -y, 1-z$  |
|                    |                  | BPNO              | H <sub>2</sub> O  | N1B-H1B...O11A     | 0.88(3)   | 1.99(3)    | 2.857(2)   | 171(3)               | $x, y, z$       |
|                    |                  |                   |                   | N5A-H5A...O112B    | 0.85(3)   | 1.85(3)    | 2.686(2)   | 170(3)               | $x, y, z$       |
|                    | H <sub>2</sub> O | BPNO              | BPNO              | O111A-H111A...O11D | 0.87(3)   | 1.95(3)    | 2.8133(19) | 171(3)               | $x, y, z$       |
|                    |                  |                   |                   | O111-H111...N11D   | 0.87(3)   | 2.53(3)    | 3.250(2)   | 141(3)               | $x, y, z$       |
|                    |                  |                   |                   | O111-H112...Br13A  | 0.76(3)   | 2.89(3)    | 3.5621(15) | 150(3)               | $1+x, y, z$     |
|                    |                  |                   |                   | O222-H221...O11A   | 0.81(3)   | 1.91(3)    | 2.7033(19) | 168(3)               | $x, y, z$       |
| O112B-H111B...N11A |                  |                   |                   | 0.87(3)            | 2.53(3)   | 3.250(2)   | 141(3)     | $x, y, z$            |                 |
| O112B-H112B...O11D |                  |                   |                   | 0.83(4)            | 2.07(4)   | 2.887(2)   | 168(3)     | $x, y, z$            |                 |
| IV                 | TTCA             | DTPNO             | N1-H1...O11       | 0.85(2)            | 1.90(2)   | 2.7542(18) | 174.8(19)  | $x, y, z$            |                 |
|                    |                  | TTCA              | N3-H3...S2        | 0.78(3)            | 2.61(3)   | 3.3833(15) | 170(2)     | $2-x, 2-y, 2-z$      |                 |
|                    |                  | DTPNO             | N5-H5...O18       | 0.81(2)            | 2.00(2)   | 2.7989(19) | 169.5(19)  | $1+x, y, 1+z$        |                 |
|                    | DTPNO            | TTCA              | C19-H19...S6      | 0.93(2)            | 2.80(2)   | 3.6754(18) | 157.3(16)  | $-1+x, y, -1+z$      |                 |
|                    |                  |                   | C15-H15...S2      | 0.95(2)            | 2.71(2)   | 3.5551(16) | 149.0(16)  | $1-x, 1-y, 1-z$      |                 |
|                    |                  |                   | C12-H12...S4      | 0.94(2)            | 2.85(2)   | 3.5089(18) | 128.2(15)  | $2-x, 1-y, 2-z$      |                 |

### III. Geometries of optimized complexes of trithiocyanuric acid - $\omega$ -B97XD/aug-cc-pVTZ.

#### 1. Complex of trithiocyanuric acid and methyl aldehyde.

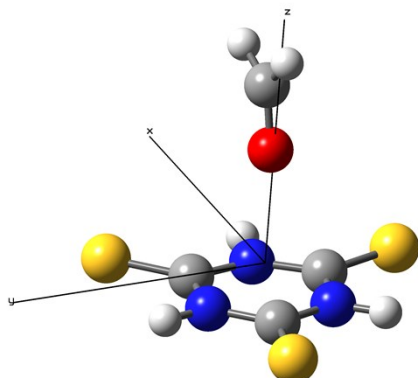

|                |           |           |           |
|----------------|-----------|-----------|-----------|
| S (Fragment=1) | -1.765378 | -0.236116 | -2.450953 |
| S (Fragment=1) | -1.125941 | -0.346999 | 2.788177  |
| S (Fragment=1) | 3.073385  | 0.157277  | -0.372396 |
| N (Fragment=1) | 0.570881  | -0.001230 | -1.225286 |
| N (Fragment=1) | -1.252328 | -0.196678 | 0.146790  |
| N (Fragment=1) | 0.847457  | -0.044034 | 1.047890  |
| H (Fragment=1) | 0.965932  | 0.036267  | -2.150894 |
| H (Fragment=1) | -2.244823 | -0.318761 | 0.265665  |
| H (Fragment=1) | 1.453428  | -0.048224 | 1.852102  |
| C (Fragment=1) | -0.785705 | -0.146508 | -1.137481 |
| C (Fragment=1) | -0.490539 | -0.195602 | 1.282429  |
| C (Fragment=1) | 1.450164  | 0.029488  | -0.177583 |
| O (Fragment=2) | 0.329578  | -2.883070 | -0.102527 |
| C (Fragment=2) | 0.183704  | -4.069852 | -0.175110 |
| H (Fragment=2) | -0.810059 | -4.522713 | -0.333254 |
| H (Fragment=2) | 1.037611  | -4.762873 | -0.087328 |

```
Counterpoise corrected energy = -1589.555033496047
      BSSE energy = 0.000409798047
      sum of monomers = -1589.547787582540
      complexation energy = -4.80 kcal/mole (raw)
      complexation energy = -4.55 kcal/mole (corrected)
```

## 2. Complex of trithiocyanuric acid and amine N-oxide.

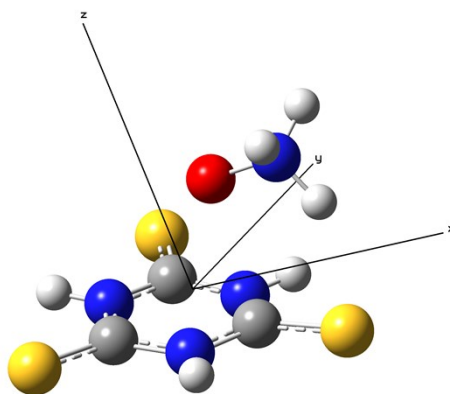

|                |           |           |           |
|----------------|-----------|-----------|-----------|
| S (Fragment=1) | -1.455910 | -1.427103 | -2.162784 |
| S (Fragment=1) | -1.132781 | 0.136347  | 2.867879  |
| S (Fragment=1) | 3.077252  | 0.532864  | -0.301587 |
| N (Fragment=1) | 0.682782  | -0.281481 | -1.084619 |
| N (Fragment=1) | -1.138731 | -0.453390 | 0.286805  |
| N (Fragment=1) | 0.866133  | 0.258612  | 1.132700  |
| H (Fragment=1) | 1.121288  | -0.450954 | -1.974639 |
| H (Fragment=1) | -2.087125 | -0.753317 | 0.440866  |
| H (Fragment=1) | 1.425206  | 0.562687  | 1.913468  |
| C (Fragment=1) | -0.589677 | -0.731992 | -0.924985 |
| C (Fragment=1) | -0.445465 | -0.029232 | 1.389194  |
| C (Fragment=1) | 1.498915  | 0.153968  | -0.074606 |
| O (Fragment=2) | 0.487395  | -2.897087 | 0.235042  |
| N (Fragment=2) | -0.018587 | -3.876734 | -0.559039 |
| H (Fragment=2) | -0.592879 | -4.540317 | -0.030502 |
| H (Fragment=2) | -0.616910 | -3.471466 | -1.303770 |
| H (Fragment=2) | 0.720188  | -4.417619 | -1.018557 |

Counterpoise corrected energy = -1606.754113601611  
BSSE energy = 0.000402283147  
sum of monomers = -1606.732364997436  
complexation energy = -13.90 kcal/mole (raw)  
complexation energy = -13.65 kcal/mole (corrected)

IV. Graphical motifs of the Hirshfeld surface 2D fingerprint plots of intermolecular interactions between two trithiocyanuric acid molecules (N-H...S and N-H...O) also between trithiocyanuric acid and *N*-oxides derivatives molecule (other) for structures I-IV.

all contacts

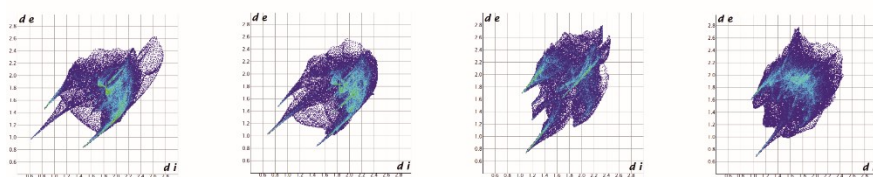

N-H...S hydrogen bonds

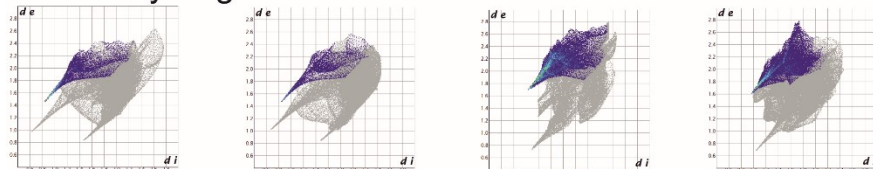

N-H...O hydrogen bonds

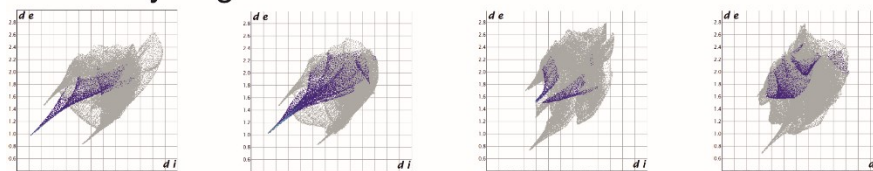

other specific contacts

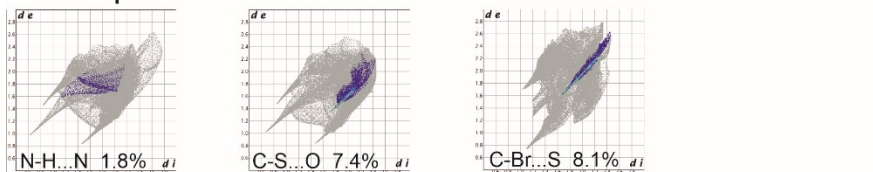

(I)

(II)

(III)

(IV)
